# Supplementary material for: Natural Strain Variation and Antibody Neutralization of Dengue Serotype 3 Viruses
Source: PLoS Pathog. 2010 Mar 19;6(3):e1000821. doi: 10.1371/journal.ppat.1000821 (PMC2841629; doi:10.1371/journal.ppat.1000821)
Supplement: Table S1 — Binding of mouse MAbs 1A1-D2 to mutant DENV3 EDIII proteins (0.01 MB PDF) [file ppat.1000821.s002.pdf]

**Table S1. Binding of mouse MAbs 1A1-D2 to mutant DENV3 EDIII proteins**

| Mutation                 | MAb 1A1-D2 Binding <sup>1</sup> |
|--------------------------|---------------------------------|
| I301A                    | 112.90                          |
| I301G                    | 101.67                          |
| N302A                    | 63.70                           |
| N302G                    | 132.26                          |
| T303A                    | 104.70                          |
| T303G                    | 109.24                          |
| <b>F304A<sup>2</sup></b> | <b>17.31</b>                    |
| <b>K308A</b>             | <b>13.28</b>                    |
| E309A                    | 78.55                           |
| V310A                    | 21.71                           |
| E323G                    | 118.07                          |
| K325A                    | 32.61                           |
| K325G                    | 26.14                           |
| <b>G326A</b>             | <b>14.80</b>                    |
| E327A                    | 63.22                           |
| <b>D328A</b>             | <b>16.07</b>                    |
| A329G                    | 45.19                           |
| <b>P330A</b>             | <b>16.24</b>                    |
| T357A                    | 92.80                           |
| T357G                    | 77.53                           |
| K358G                    | 86.87                           |
| E361G                    | 49.49                           |
| I380G                    | 99.17                           |
| D382G                    | 64.42                           |
| K383A                    | 85.78                           |
| K383G                    | 86.01                           |
| K386A                    | 60.02                           |
| K386G                    | 47.75                           |

<sup>1</sup> Binding to each mutant expressed as a percentage of binding to wild type EDIII protein from genotype II

<sup>2</sup> The values in bold indicate mutations that reduced MAb binding by >80% compared to the wild type EDIII
